# Supplementary material for: Effect of Matrix and Graphite Filler on Thermal Conductivity of Industrially Feasible Injection Molded Thermoplastic Composites
Source: MDPI journal article supplement (doi:10.3390/polym11010087), 2019-01-08
Supplement: s1 [file s1]

# **Supporting Information for ‘Effect of matrix and graphite filler on thermal conductivity of industrially feasible injection molded thermoplastic composites’**

**Tom Wieme <sup>1</sup>, Lingyan Duan <sup>1</sup>, Nicolas Mys <sup>1</sup>, Ludwig Cardon <sup>1\*</sup> and Dagmar R. D’hooge<sup>2,3,\*</sup>**

<sup>1</sup> Centre for Polymer and Material Technologies, Department of Materials, Textiles and Chemical Engineering, Ghent University, Technologiepark 915, B-9052 Zwijnaarde (Ghent)

<sup>2</sup> Laboratory for Chemical Technology, Department of Materials, Textiles and Chemical Engineering, Ghent University, Technologiepark 914, B-9052 Zwijnaarde (Ghent), Belgium

<sup>3</sup> Centre for Textile Science and Engineering, Department of Materials, Textiles and Chemical Engineering, Ghent University, Technologiepark 907, B-9052 Zwijnaarde (Ghent), Belgium

\* Correspondence: dagmar.dhooge@ugent.be ; ludwig.cardon@ugent.be

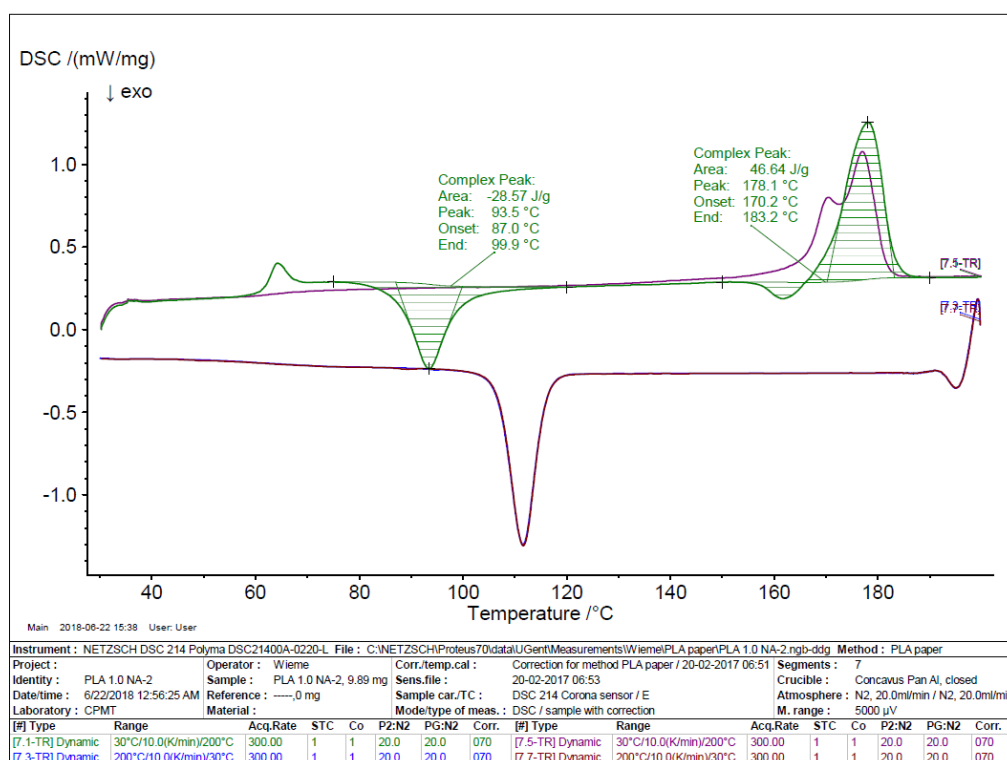

Figure S1: DSC diagram of PLA with 1 m% nucleating agent before annealing. The first run (green) clearly shows cold crystallization

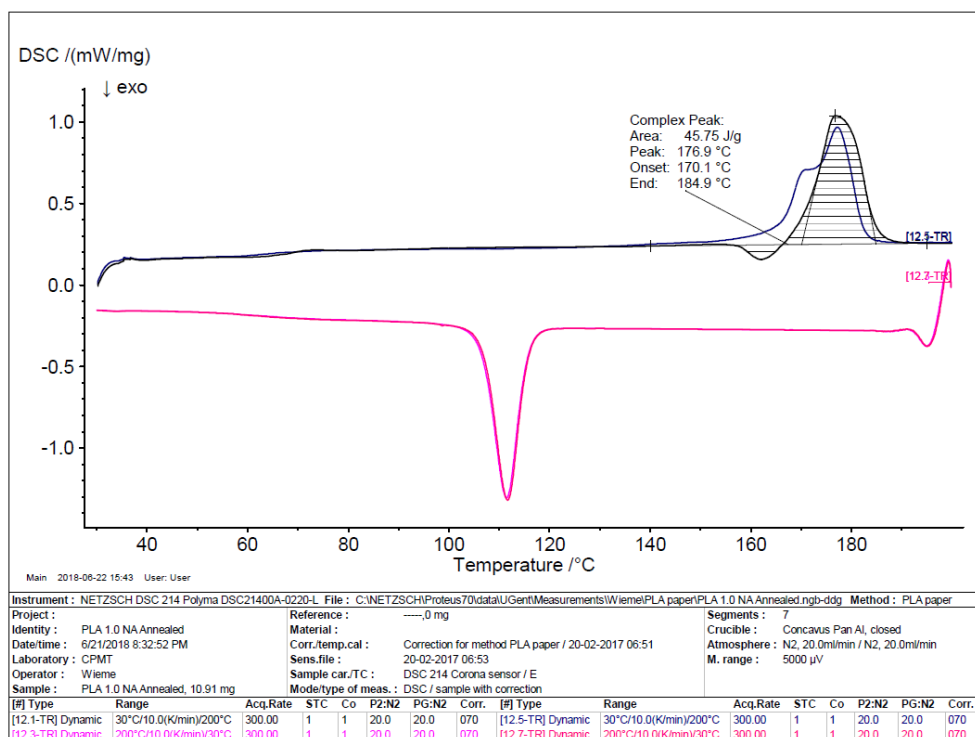

Figure S2: DSC diagram of PLA with 1 m% nucleating agent after annealing. The first run (black) shows no cold crystallization.
